# Supplementary material for: Background and evaluation design of a community-based health-promoting school intervention: Fit Lifestyle at School and at Home (FLASH)
Source: Springer Nature journal article supplement (doi:10.1186/s12889-019-7088-3), 2019-06-20
Supplement: MOESM1 [file 16838510]

**Additional file 1 – overview of themes, topics, questions and response categories of the self-reported questionnaire among students in the FLASH intervention**

| <b>HEALTH BEHAVIORS</b>   |                                                                                                                                                                                                    |                                                                                                                                                                                                                                                                                                                                                                                                                                                                                                                                                                                                       |                                                                                                                                                                                                                                                                                                                                                                                                                                        |
|---------------------------|----------------------------------------------------------------------------------------------------------------------------------------------------------------------------------------------------|-------------------------------------------------------------------------------------------------------------------------------------------------------------------------------------------------------------------------------------------------------------------------------------------------------------------------------------------------------------------------------------------------------------------------------------------------------------------------------------------------------------------------------------------------------------------------------------------------------|----------------------------------------------------------------------------------------------------------------------------------------------------------------------------------------------------------------------------------------------------------------------------------------------------------------------------------------------------------------------------------------------------------------------------------------|
| <b>THEME</b>              | <b>Topic</b>                                                                                                                                                                                       | <b>Question</b>                                                                                                                                                                                                                                                                                                                                                                                                                                                                                                                                                                                       | <b>Response categories</b>                                                                                                                                                                                                                                                                                                                                                                                                             |
| <b>PHYSICAL ACTIVITY</b>  | <ul style="list-style-type: none"> <li>- Active transport</li> <li>- Exercise during free time</li> <li>- PA a week</li> </ul>                                                                     | <ul style="list-style-type: none"> <li>- On how many days: do you walk or bike to school/ do you exercise at a club/ do you exercise without a club?</li> <li>- How long do you walk or bike to school?</li> <li>- How many days do you exercise at a club/ without a club?</li> <li>- How many days do you exercise at least one hour?</li> </ul>                                                                                                                                                                                                                                                    | <ul style="list-style-type: none"> <li>- (almost) never/ 1/2/3/4/5 day(s) a week</li> <li>- I don't walk or bike/1-5/6-10/11-15/16-30/31-45/more than 45 minutes</li> <li>- (almost) never/ 1/ 2-3/ 4-5/ (almost) every day a week</li> <li>- (almost) never/1/2/3/4/5/6/7 days a week</li> </ul>                                                                                                                                      |
| <b>SEDENTARY BEHAVIOR</b> | <ul style="list-style-type: none"> <li>- Gaming</li> <li>- Social media</li> <li>- Watching TV/screen time</li> </ul>                                                                              | <ul style="list-style-type: none"> <li>- How many times do you play games/ use social media/ watch programs on TV or other screen?</li> <li>- How long do you play games/ use social media/ watch programs on TV or other screen on an average week day?</li> <li>- How long did you play games/ use social media/ watch programs on TV or other screen yesterday?</li> </ul>                                                                                                                                                                                                                         | <ul style="list-style-type: none"> <li>- (almost) never/ 1/ 2-3/ 4-5/ (almost) every day a week</li> <li>- Not at all/0.5/1/2/3/4/5/6 or more hour(s) a day</li> <li>- Not at all/0.5/1/2/3/4/5/6 or more hour(s) a day</li> </ul>                                                                                                                                                                                                     |
| <b>SLEEP BEHAVIOR</b>     | Sleep behavior                                                                                                                                                                                     | <ul style="list-style-type: none"> <li>- What time do you go to bed on a weekday?</li> <li>- What time do you go to sleep on a weekday?</li> <li>- What time do you wake up on a weekday?</li> </ul>                                                                                                                                                                                                                                                                                                                                                                                                  | <ul style="list-style-type: none"> <li>- 21.00 or earlier/ 21.30/ 22.00/ 22.30/ 23.00/ 23.30/ 00.00/ 00.30/ 01.00 or later</li> <li>- 21.00 or earlier/ 21.30/ 22.00/ 22.30/ 23.00/ 23.30/ 00.00/ 00.30/ 01.00 or later</li> <li>- 6.00 or earlier/ 6.15/ 6.30/ 6.45/ 7.00/ 7.15/ 7.30/ 7.45/ 8.00/ 8.15/ 8.30/ 8.45/ 9.00 or later</li> </ul>                                                                                         |
| <b>DIETARY BEHAVIOR</b>   | <ul style="list-style-type: none"> <li>- Healthy dietary behavior (breakfast, fruit, vegetable, water)</li> <li>- Unhealthy dietary behavior (sugar sweetened beverages, snacks, candy)</li> </ul> | <ul style="list-style-type: none"> <li>- How many days a week do you eat breakfast/ eat fruit/ eat vegetables/ drink water?</li> <li>- How much water do you drink on an average weekday?</li> <li>- How much water did you drink yesterday</li> <li>- On how many days do you eat/drink regular soda/ fruit juices/ snacks/ candy?</li> <li>- How much regular soda (small/large)/ fruit juices (small/large)/ snacks/candy do you eat/drink on an average weekday?</li> <li>- How much regular soda (small/large)/ fruit juices (small/large)/ snacks/candy did you eat/drink yesterday?</li> </ul> | <ul style="list-style-type: none"> <li>- (almost) never/1/2/3/4/5/6/7 days a week</li> <li>- 0/1/2/3/4/5/6/7 or more glasses</li> <li>- 0/1/2/3/4/5/6/7 or more glasses</li> <li>- (almost) never/1/2/3/4/5/6/7 days a week</li> <li>- 0/1/2/3/4/5/6/7 or more glasses or small bottles/ cans or big bottles/ snacks/ candy</li> <li>- 0/1/2/3/4/5/6/7 or more glasses or small bottles/ cans or big bottles/ snacks/ candy</li> </ul> |

| <b>DETERMINANT OF HEALTH BEHAVIOR: ATTITUDE</b>                                                                  |                                                                                                                                                                                                                                                                                                                                                                                                                                                                                                                                                                                                                                                                                                                                      |                                                                                                                                                                                                                                                                               |
|------------------------------------------------------------------------------------------------------------------|--------------------------------------------------------------------------------------------------------------------------------------------------------------------------------------------------------------------------------------------------------------------------------------------------------------------------------------------------------------------------------------------------------------------------------------------------------------------------------------------------------------------------------------------------------------------------------------------------------------------------------------------------------------------------------------------------------------------------------------|-------------------------------------------------------------------------------------------------------------------------------------------------------------------------------------------------------------------------------------------------------------------------------|
| <b>THEME</b>                                                                                                     | <b>QUESTION</b>                                                                                                                                                                                                                                                                                                                                                                                                                                                                                                                                                                                                                                                                                                                      | <b>RESPONSE CATEGORY</b>                                                                                                                                                                                                                                                      |
| <b>TOWARDS HEALTH</b>                                                                                            | What do you think about regular soda/ energy drinks/ fruit juices/ eating snacks/ eating candy/ drinking water/ eating breakfast daily/ eating fruit/ exercising 1 hour a day/ gaming every day/ using social media every day/ watching programs every day/ waking or biking to school every day?                                                                                                                                                                                                                                                                                                                                                                                                                                    | Very good/ good/ not bad or good/ bad/ very bad                                                                                                                                                                                                                               |
| <b>TOWARDS SOCIAL ENVIRONMENT (PARENTS)</b><br>- HAVING RULES<br>- AVAILABILITY<br>- MODELING<br>- ENCOURAGEMENT | 1.Do your parents have a rule about: eating breakfast/ fruit/ vegetables/ candy/ snacks/ drinking sodas or fruit juices/ energy drinks/ how long you can spend on a screen/ engaging in a sport/ walking or biking to school? (if yes, then a how many times a month do your parents keep you to this rule was prompted)<br>2.How many days a week are there sodas or fruit juices/ candy/ snacks/ fruit in the house?<br>3.How many times does your father/mother/other exercise/ use a screen at home/ eat candy/ eat snacks/ drink soda or fruit juice/ drink water?<br>4.How many times do your parents stimulate you to exercise/ use a screen les/ eat less snacks or candy/ drink less soda or fruit juice/ drink more water? | 1.Yes/ No (less than once/ once/ multiple times a month/ multiple times a week)<br>2.Less than once/ once/ 2-3/ 4-5/ 6-7 days a week<br>3.Less than once/ once/ 2-3/ 4-5/ 6-7 days a week<br>4.Less than once/ once/ multiple times a month/ multiple times a week/ every day |
| <b>TOWARDS SOCIAL ENVIRONMENT (PEERS)</b>                                                                        | To what extent do your friends exercise at a club/ exercise on the street/ walk or bike to school/ engage in more than 3 hours of screen time/ use social media/ eat snacks/ eat candy/ drink soda/ energy drinks/ fruit juices/ water/ bring fruit to school/ eat breakfast daily/ buy snacks in school canteen/ buy snacks in supermarket                                                                                                                                                                                                                                                                                                                                                                                          | Totally agree/ agree/ don't disagree or agree/ disagree/ totally disagree                                                                                                                                                                                                     |
| <b>TOWARDS PHYSICAL ENVIRONMENT</b>                                                                              | 1.Our school canteen/vending machines has/have enough healthy products<br>2.There are enough places I can fill my water bottle/ be physically active<br>3.During break time I have enough time/space to eat my lunch<br>4.I regularly buy healthy products in the canteen/vending machines/supermarket<br>5.How often do you buy sodas, fruit juices or energy drinks/ snacks or candy at school/at the supermarket                                                                                                                                                                                                                                                                                                                  | 1-4: Totally agree/ agree/ disagree/ totally disagree<br>5: (almost) never/ 1/ 2-3/ 4-5/ 6-7 days a week                                                                                                                                                                      |
| <b>TOWARDS HEALTH EDUCATION</b>                                                                                  | 1.I want to learn how to make healthy food/ make a healthy choice/ whether I eat healthy<br>2.I like our lessons at school about healthy food/ about Physical Education (PE)<br>3.Lessons at school made me eat more healthy/ made me exercise more in my free time/ gave me an idea of the type of sport I want to do/ learned me about healthy PA<br>4.I like more PE lessons/ I am active during PE lessons                                                                                                                                                                                                                                                                                                                       | 1-4: Totally agree/ agree/ disagree/ totally disagree                                                                                                                                                                                                                         |
